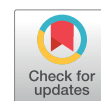

## Issues and Events

### COVID-19 AND DIABETES: RESOURCE WEBPAGE

The American Diabetes Association is dedicated to ensuring that you stay informed of the latest COVID-19 research and guidelines. Our new online page for diabetes professionals includes essential resources and information—including webinars, patient guidance, relevant news articles, a discussion forum, and more. Follow updates and join the conversation at [professional.diabetes.org/content-page/covid-19](https://professional.diabetes.org/content-page/covid-19).

### SPECIAL PODCAST SERIES: COVID-19 & DIABETES

In this special podcast series, Drs. Neil Skolnik and John J. Russell of Abington Jefferson Health are joined by the leading experts in diabetes treatment and care to discuss the latest information and recommendations for treating diabetes during the COVID-19 pandemic. The episodes feature a wide range of topics, such as planning sick days, inpatient management, telehealth, self-care, and more. To listen to the ongoing series, visit [diabetesjournals.org/content/covid-19-podcasts](https://diabetesjournals.org/content/covid-19-podcasts).

### ADVANCED POSTGRADUATE COURSE WEBCASTS

Webcasts from the 67th annual American Diabetes Association Advanced Postgraduate Course are available. Held in February 2020, the American Diabetes Association brought together professionals and diabetes experts for presentations and discussions on cutting-edge clinical research in diabetes. The courses covered the latest clinical research translated into evidence-based treatment strategies to improve outcomes in patients with diabetes. To access the webcasts, please visit [ada.healthmonix.com/allcourses](https://ada.healthmonix.com/allcourses).

### EDUCATION RECOGNITION PROGRAM

The American Diabetes Association's Education Recognition Program (ERP) provides registered diabetes education programs and services with a variety of benefits, as well as access

to educational materials, resources, and marketing opportunities. For more information on requirements, benefits, and instructions on how to apply, visit [professional.diabetes.org/diabetes-education](https://professional.diabetes.org/diabetes-education).

### STANDARDS OF MEDICAL CARE IN DIABETES—2020

American Diabetes Association "Standards of Medical Care in Diabetes" is based on a complete review of the relevant literature by a diverse group of highly trained clinicians and researchers. After weighing the quality of evidence, from rigorous double-blind clinical trials to expert opinion, recommendations are drafted, reviewed, and submitted for approval to the American Diabetes Association Executive Committee. To see the 2020 Standards, please visit [professional.diabetes.org/SOC](https://professional.diabetes.org/SOC).

### DIABETES STANDARDS OF CARE 2020 HIGHLIGHTS WEBCAST

Join ADA's Chair of the Professional Practice Committee, Joshua J. Neumiller, PharmD, CDE, FASCP, for a presentation on the key updates and highlights from the *Standards of Medical Care in Diabetes—2020*. To access the webcast, please visit [professional.diabetes.org/SOC](https://professional.diabetes.org/SOC).

### DIABETES CARE ONLINE COLLECTIONS

*Diabetes Care* periodically publishes special article collections related to a specific topic, study, or aspect of diabetes care, prevention, and treatment. These collections appear in the print and online editions of *Diabetes Care*. Learn more about previously published collections at [care.diabetesjournals.org/content/diabetes-care-online-collections](https://care.diabetesjournals.org/content/diabetes-care-online-collections).
